# Supplementary material for: Differences of Clinical Characteristics and Drug Prescriptions between Men and Women with COPD in China
Source: MDPI journal article supplement (doi:10.3390/toxics11020102), 2023-01-21
Supplement: s1 [file s1]

**Table S1. Correlations of CAT in men and women.**

|                              | CAT1- Cough |        | CAT2- Phlegm |         | CAT3- Chest<br>tightness |         | CAT4-<br>Breathlessness |         | CAT5- Activities |         | CAT6-<br>Confidence |         | CAT7- Sleep |        | CAT8- Energy |         | Sum of CAT |         |
|------------------------------|-------------|--------|--------------|---------|--------------------------|---------|-------------------------|---------|------------------|---------|---------------------|---------|-------------|--------|--------------|---------|------------|---------|
|                              | Men         | Women  | Men          | Women   | Men                      | Women   | Men                     | Women   | Men              | Women   | Men                 | Women   | Men         | Women  | Men          | Women   | Men        | Women   |
| <b>Age</b>                   | 0.060*      | 0.042  | 0.055*       | 0.023   | 0.022                    | 0.029   | 0.176*                  | 0.190*  | 0.203*           | 0.160*  | 0.139*              | 0.218*  | 0.005       | 0.050  | 0.203*       | 0.160*  | 0.191*     | 0.178*  |
| <b>BMI</b>                   | -0.124*     | -0.003 | -0.117*      | -0.036  | -0.062                   | -0.032  | -0.111                  | -0.041  | -0.128           | -0.084* | -0.108              | -0.044  | -0.050      | -0.033 | -0.128       | -0.084* | -0.168     | -0.081* |
|                              |             |        |              |         | *                        |         | *                       |         | *                |         | *                   |         |             |        | *            |         | *          |         |
| <b>Educational level</b>     | -0.056*     | -0.045 | -0.022       | -0.002  | -0.009                   | -0.036  | -0.122                  | -0.179* | -0.139           | -0.145* | -0.076              | -0.087* | -0.060      | -0.020 | -0.139       | -0.145* | -0.134     | -0.149* |
|                              |             |        |              |         |                          |         | *                       |         | *                |         | *                   |         | *           |        | *            |         | *          |         |
| <b>Marital status</b>        | 0.002       | -0.075 | -0.019       | -0.120* | -0.013                   | 0.004   | 0.028                   | 0.035   | 0.024            | 0.074   | -0.013              | -0.023  | -0.001      | 0.040  | 0.024        | 0.074   | 0.010      | 0.025   |
| <b>AE</b>                    | 0.134*      | 0.140* | 0.133*       | 0.086*  | 0.151*                   | 0.069*  | 0.206*                  | 0.151*  | 0.212*           | 0.282*  | 0.166*              | 0.125*  | 0.159*      | 0.135* | 0.212*       | 0.282*  | 0.282*     | 0.274*  |
| <b>Cigarette smoking</b>     | -0.011      | -0.010 | 0.018        | -0.010  | -0.019                   | -0.006  | 0.041                   | 0.071   | 0.134*           | 0.052   | -0.032              | 0.095*  | -0.065      | 0.021  | 0.134*       | 0.052   | 0.059*     | 0.065   |
|                              |             |        |              |         |                          |         |                         |         |                  |         |                     |         | *           |        |              |         |            |         |
| <b>Occupational exposure</b> | 0.083       | -0.040 | 0.039        | -0.026  | -0.013                   | 0.046   | 0.100*                  | -0.027  | 0.109*           | -0.114  | -0.015              | -0.003  | 0.053       | -0.077 | 0.109*       | -0.114  | 0.101*     | -0.095  |
|                              |             |        |              |         |                          |         |                         |         |                  |         |                     |         |             |        |              |         |            |         |
| <b>Biomass exposure</b>      | 0.063       | 0.132* | 0.014        | 0.087   | 0.147*                   | 0.110*  | 0.147*                  | 0.149*  | 0.074            | 0.106*  | -0.056              | 0.041   | -0.051      | 0.047  | 0.074        | 0.106*  | 0.118*     | 0.150*  |
| <b>FEV1%pre</b>              | -0.152      | -0.079 | -0.194*      | -0.161* | -0.144                   | -0.161* | -0.340                  | -0.339* | -0.304           | 0.352*  | -0.221              | -0.243* | -0.088      | -0.049 | -0.304       | -0.352* | -0.360     | -0.367* |
|                              |             |        |              |         | *                        |         | *                       |         | *                |         | *                   |         | *           |        | *            |         | *          |         |

**Note:** BMI, body mass index; AE: acute exacerbation; FEV<sub>1</sub>%pre: forced expiratory volume in one second percent predicted. Spearman's rank correlation coefficient was used, \**P*<0.05
